# Supplementary material for: Cu(i) and Pb(ii) complexes containing new tris(7-naphthyridyl)methane derivatives: Synthesis, structures, spectroscopy and geometric conversion
Source: Royal Society of Chemistry journal article supplement (doi:10.1039/c0dt01747g), 2011-01-01

## Electronic supporting information

### **Cu(I) and Pb(II) complexes containing new tris(7-naphthyridyl)methane derivatives: Synthesis, structures, spectroscopy and geometric conversion**

Xin Gan,<sup>a</sup> Shao-Ming Chi,<sup>a</sup> Wei-Hua Mu,<sup>a</sup> Jia-Can Yao,<sup>a</sup> Li Quan,<sup>b</sup> Cong Li,<sup>a</sup> Zhao-Yong Bian,<sup>b</sup>

Yong Chen,<sup>b</sup> Wen-Fu Fu<sup>\*a,b</sup>

<sup>a</sup> *College of Chemistry and Chemical Engineering Yunnan Normal University, Kunming 650092, P. R. China*

<sup>b</sup> *Key Laboratory of Photochemical Conversion and Optoelectronic Materials, HKU-CAS Joint Laboratory on New Materials, Technical Institute of Physics and Chemistry Chinese Academy of Sciences, Peking 100190, P. R. China*

**Figure S1.** The absorption spectra of  $L^1$  in  $CH_2Cl_2$  (solid line),  $CH_3CN$  (dashed line) and  $CH_3OH$  (dashed dot line).

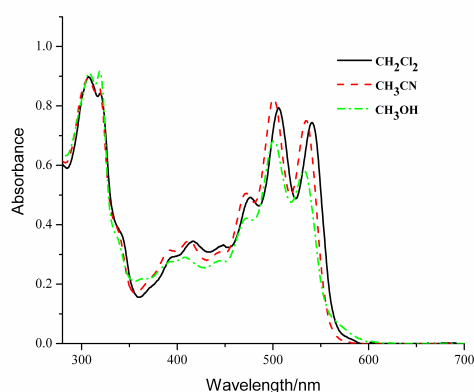

**Figure S2.** Plots of the relevant HOMO and LUMO for  $L^1$  and  $L^1H^+(3)$ .

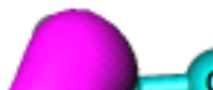

**Figure S3.** Room-temperature solid-state emission spectrum of  $L^2$  with excitation at 500 nm.

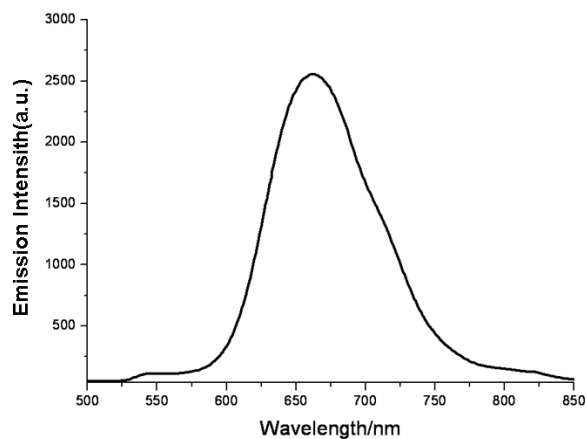

**Figure S4.** The absorption spectral changes of titration  $[Cu(CH_3CN)_4]BF_4$  to  $L^1$  of  $CH_3OH$  solution at room

temperature  $[\text{Cu}^+]$ : 0-0.4 equiv. Inset:  $[\text{Cu}^+]$ : 0.4-1.0 equiv, final absorption spectrum (dashed dot line) following the addition of  $\text{PPh}_3$  in  $\text{CH}_2\text{Cl}_2$  to the solution of the  $[\text{Cu}(\text{CH}_3\text{CN})_4]\text{BF}_4$  titration  $[\text{PPh}_3]$ : 1.0 equiv.

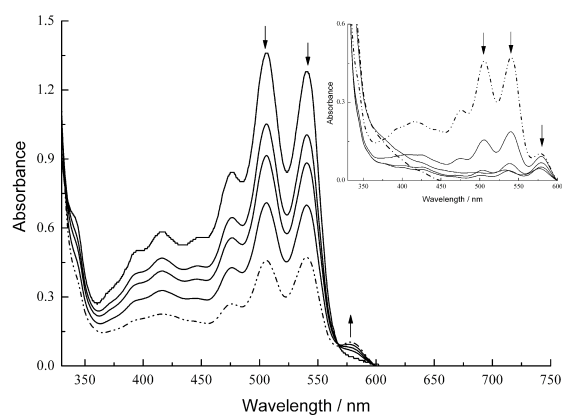

**Table S1.** Total energies ( $E_{\text{tot}}$ : a.u) and relative energies ( $\Delta E$ : kcal·mol<sup>-1</sup>) for  $\text{L}^1\text{H}^+$ (1-4) and  $\text{L}^1\text{H}^+$ (6) obtained at the SCRFB3LYP/6-311++G(d,p) level in  $\text{CH}_2\text{Cl}_2$  solution.

| Species                    | $E_{\text{tot}}$ | $\Delta E$ |
|----------------------------|------------------|------------|
| $\text{L}^1\text{H}^+$ (3) | -1947.886562     | 0.0        |
| $\text{L}^1\text{H}^+$ (4) | -1947.883769     | 1.8        |
| $\text{L}^1\text{H}^+$ (2) | -1947.877734     | 5.5        |
| $\text{L}^1\text{H}^+$ (6) | -1947.875389     | 7.0        |
| $\text{L}^1\text{H}^+$ (1) | -1947.874666     | 7.5        |

**Table S2.** Total energies ( $E_{\text{tot}}$ : a.u) and relative energies ( $\Delta E$ : kcal·mol<sup>-1</sup>) for  $\text{L}^1$ ,  $\text{L}^1_{\text{N}(1-4)}$ ,  $\text{L}^1_{\text{N}(6)}$  and  $\text{L}^1_{\text{C}(10)}$  obtained at the SCRFB3LYP/6-311++G(d,p) level in  $\text{CH}_2\text{Cl}_2$  solution.

| Species                     | $E_{\text{tot}}$ | $\Delta E$ |
|-----------------------------|------------------|------------|
| $\text{L}^1_{\text{N}(6)}$  | -1947.412090     | 15.9       |
| $\text{L}^1_{\text{N}(3)}$  | -1947.424294     | 8.3        |
| $\text{L}^1_{\text{N}(2)}$  | -1947.435864     | 1.0        |
| $\text{L}^1$                | -1947.437488     | 0.0        |
| $\text{L}^1_{\text{C}(10)}$ | -1947.423082     | 9.0        |
| $\text{L}^1_{\text{N}(4)}$  | -1947.415497     | 13.8       |
| $\text{L}^1_{\text{N}(1)}$  | -1947.400905     | 23.0       |

<sup>1</sup>H-NMR of L<sup>1</sup>

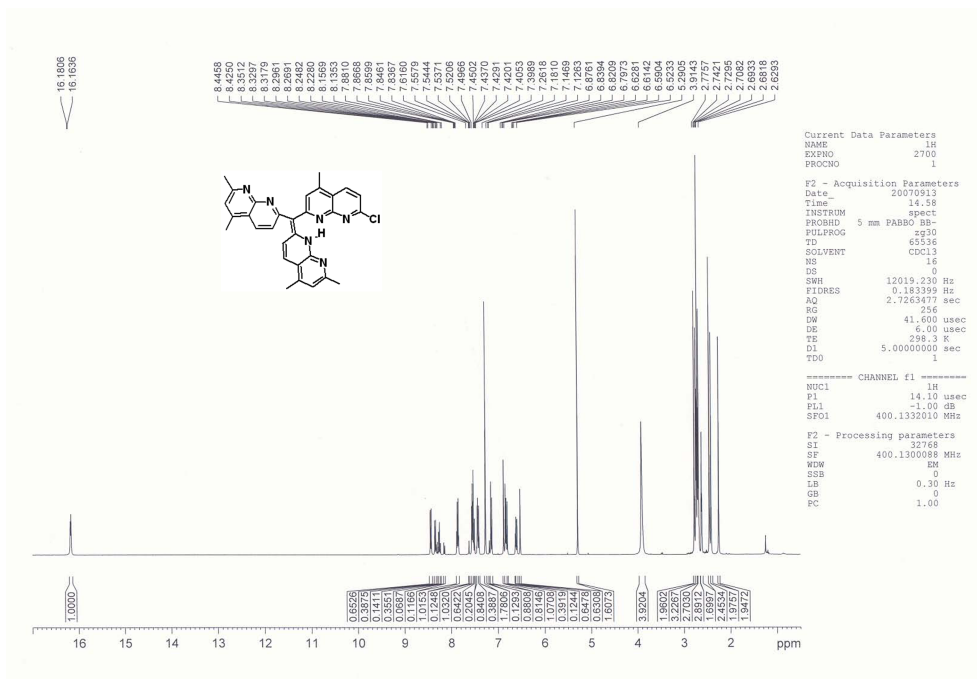

<sup>1</sup>H-NMR of L<sup>2</sup>

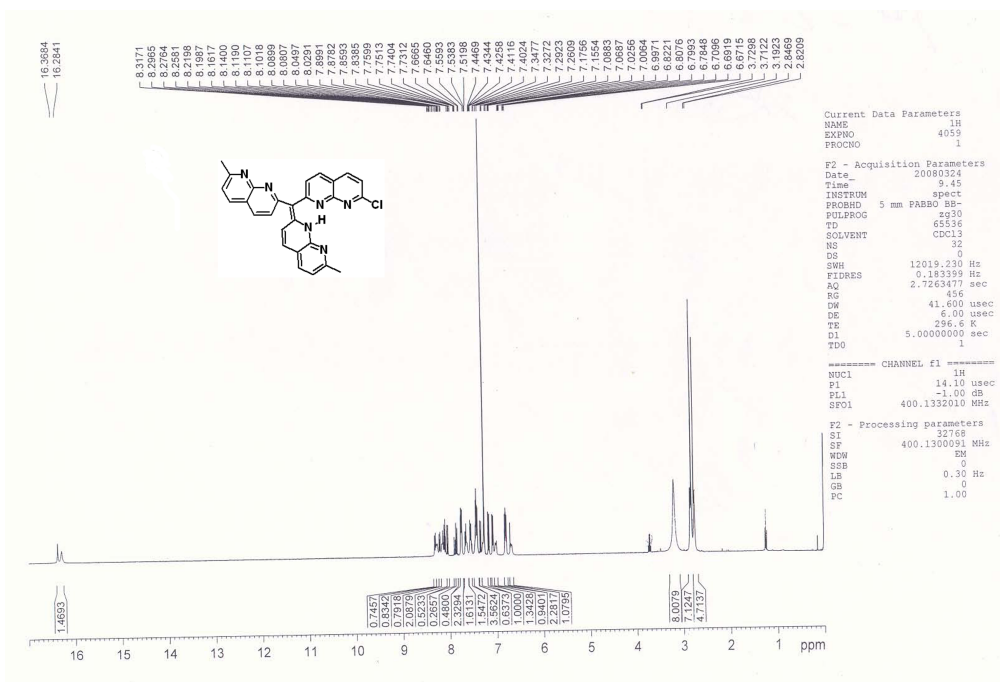

### <sup>1</sup>H-NMR of complex 1

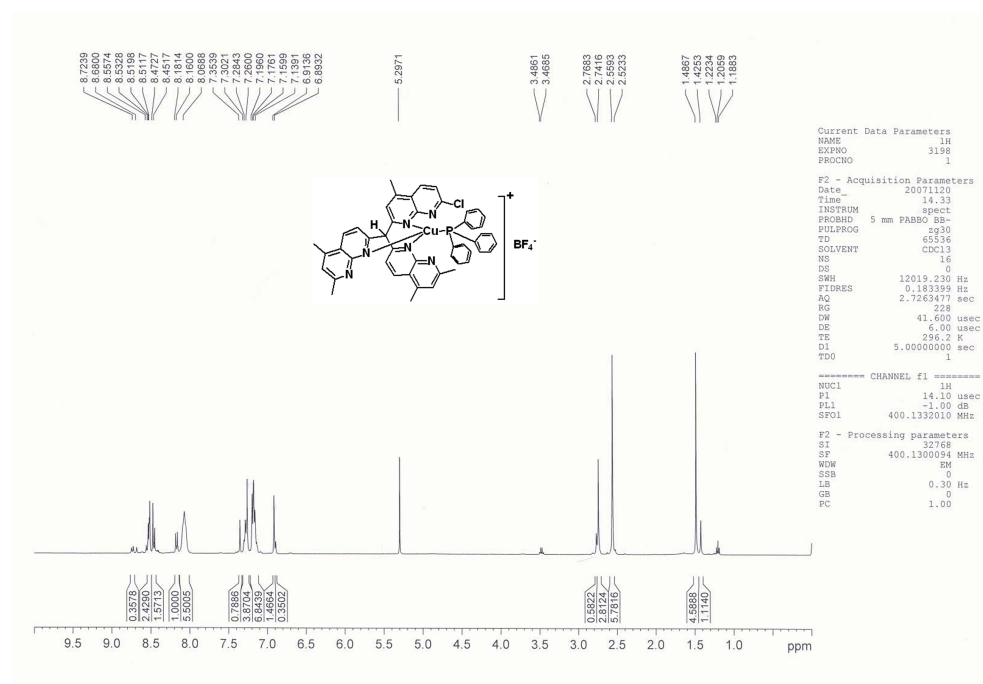

### <sup>1</sup>H-NMR of complex 3

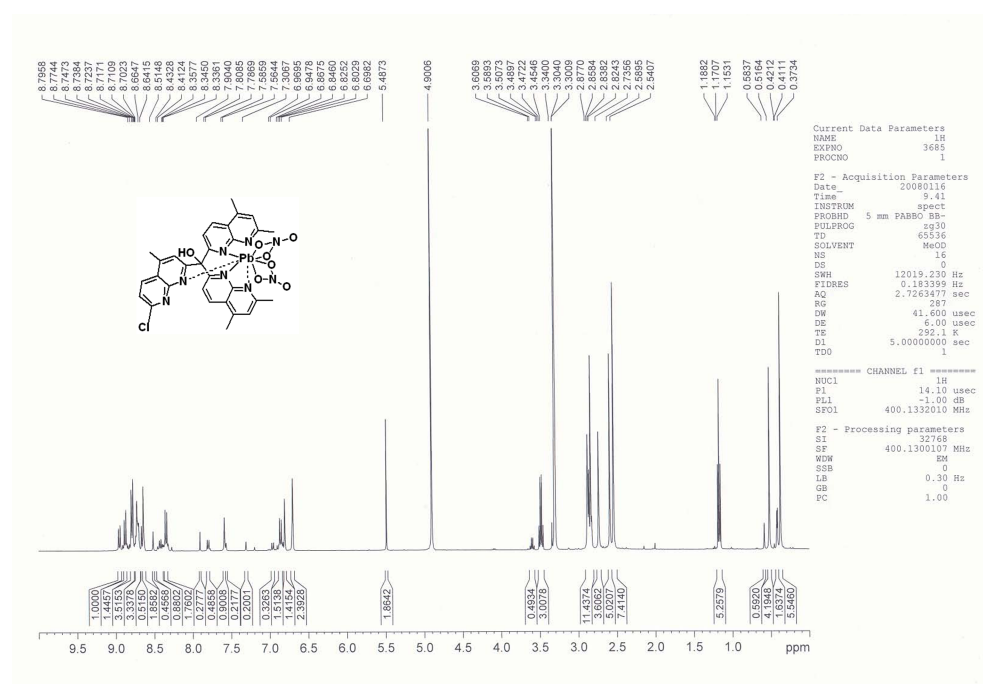

Supplement: c0dt01747g.pdf [file c0dt01747g.pdf]
